# Supplementary material for: A new strategy: realization of organic heteroepitaxy and organic alloys based on the similarity of CC and NN
Source: Royal Society of Chemistry journal article supplement (doi:10.1039/d3ce00098b), 2023-01-01
Supplement: d3ce00098b1.pdf [file d3ce00098b1.pdf]

# Supporting information

Shaoqing Guan, Guixia Zhao, Yichen Sun, Zhenxun Tang, Jiahong Pan, Jianjun Wang, Zhuoyu Ji\*,  
Xiangke Wang\*

College of Environmental Science and Engineering, North China Electric Power  
University, Beijing 102206, China.

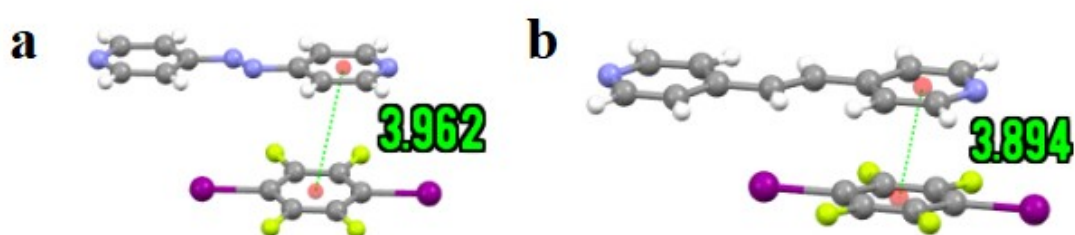

**Figure S1.** (a)  $\pi$ - $\pi$  interactions between AZO and pdIFB. (b)  $\pi$ - $\pi$  interactions between BPE and pdIFB.

**Table S1.** Summarized crystallographic parameters of AIC and BIC

|            | a (Å)        | b (Å)        | c (Å)         | $\alpha$ (°)  | $\beta$ (°)   | $\gamma$ (°)  |
|------------|--------------|--------------|---------------|---------------|---------------|---------------|
| <b>AIC</b> | <b>4.660</b> | <b>9.128</b> | <b>22.550</b> | <b>94.046</b> | <b>94.548</b> | <b>92.390</b> |
| <b>BIC</b> | <b>4.733</b> | <b>9.065</b> | <b>22.598</b> | <b>94.530</b> | <b>93.220</b> | <b>92.320</b> |

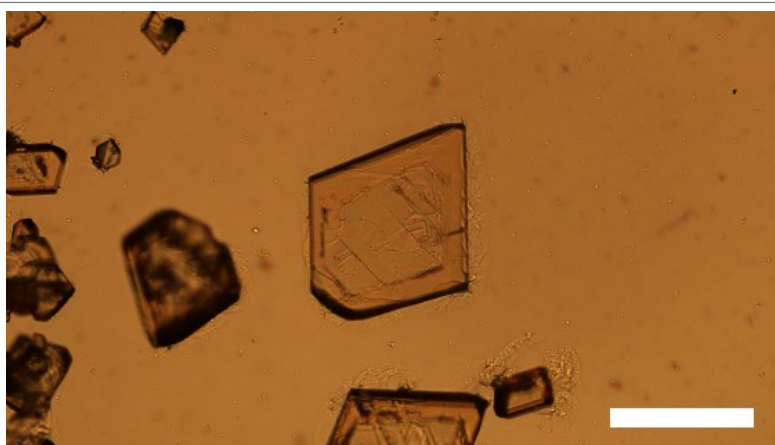

**Figure S2.** Heteroepitaxial growth optical image of pdAIC on pdBIC. scale bar, 100  $\mu$ m.

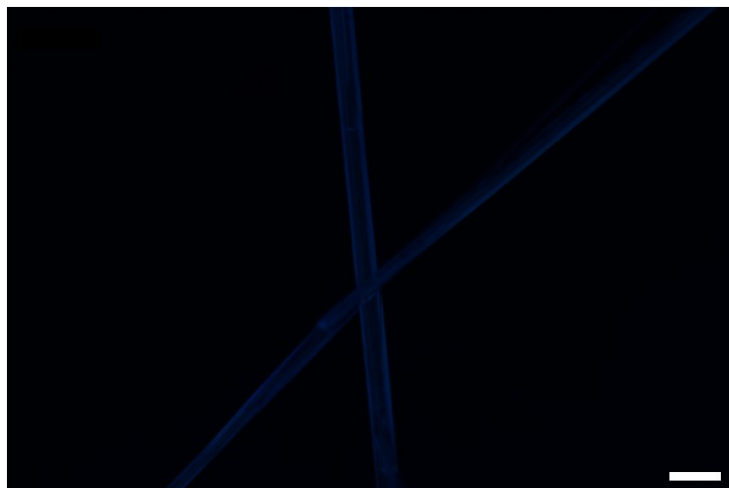

Figure S3. Fluorescence microscopy images of AZO<sub>10%</sub>-BPE<sub>90%</sub>-IFB alloy microribbons.

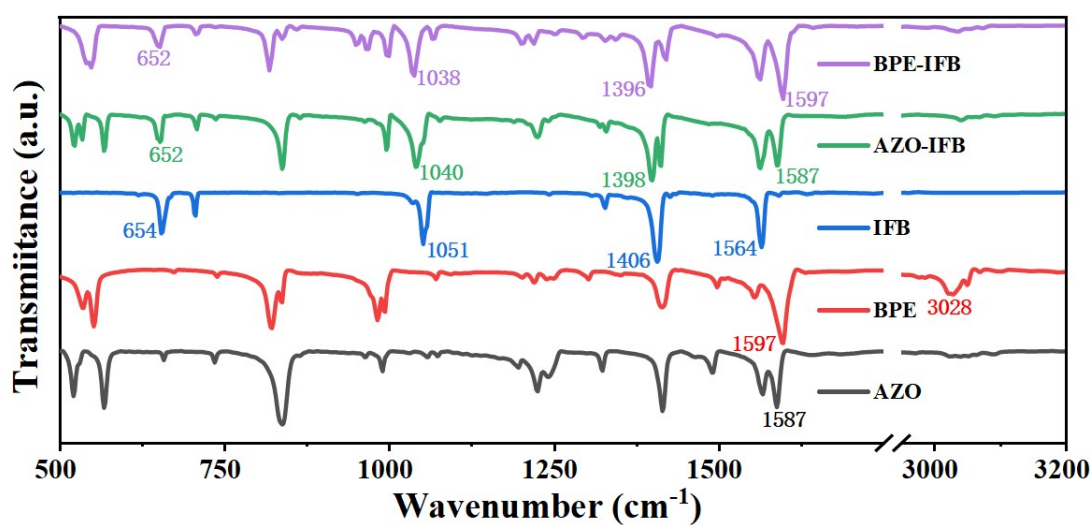

Figure S4. Infrared (IR) spectra of AZO, BPE and IFB powder, AZO-IFB cocrystals and BPE-IFB cocrystals.

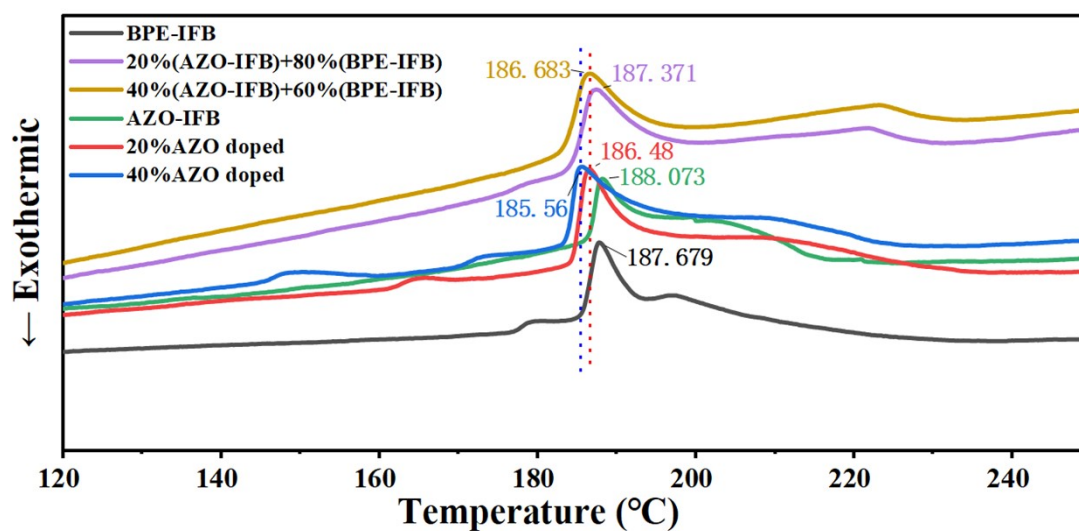

Figure S5. Differential Thermal Analysis (DTA) spectra of AZO-IFB cocrystals and BPE-IFB cocrystals.

**Table S2.** the dopant concentrations in the crystals at 1%, 3%, 5% doped ratio.

| Doping Ratio       | 1%    | 3%   | 5%   |
|--------------------|-------|------|------|
| <sup>1</sup> H-NMR | 0.67% | 2.7% | 6.9% |

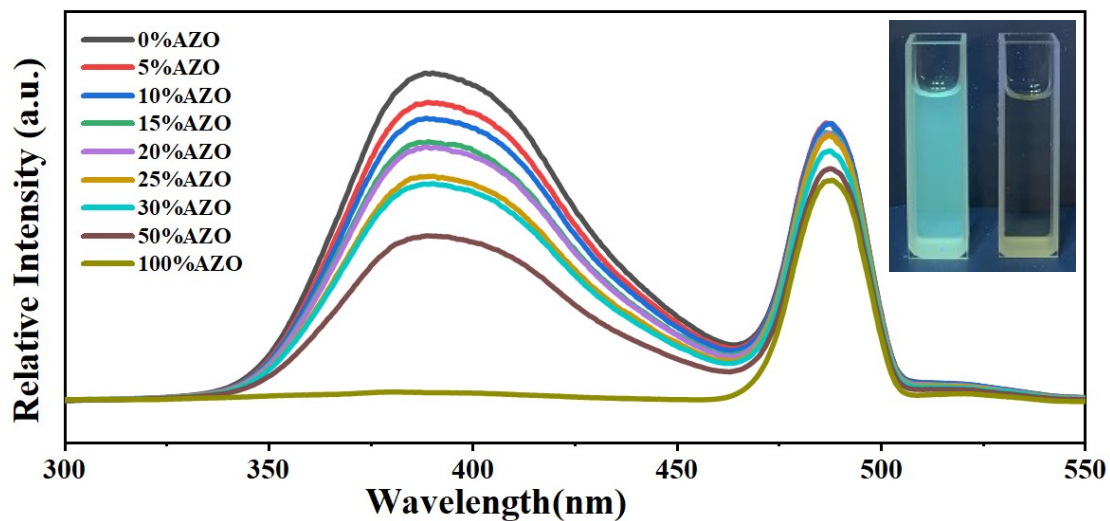

**Figure S6.** Photoluminescence (PL) spectra of  $AZO_x$ - $BPE_{1-x}$ -IFB mixed solution ( $x = 0, 5\%, 10\%, 15\%, 20\%, 25\%, 30\%, 50\%, 100\%$ ) when excited by unfocused UV light. In the upper right corner, BPE-IFB solution with fluorescence is on the left and nonfluorescent AZO-IFB solution is on the right.
